# Supplementary material
Source: HighWire-hosted journal article supplement (https://rapm.bmj.com/content/46/11/971)
Supplement: inline-supplementary-material-3 [file inline-supplementary-material-3.pdf]

Table A3: The perioperative impact of anaesthesia technique with or without PNB use in THA/TKA presented in risk ratios

| THA                                                                                                                       |                           |         |
|---------------------------------------------------------------------------------------------------------------------------|---------------------------|---------|
| Complications                                                                                                             | Total RR                  | N       |
| Mortality <sup>6, 43</sup>                                                                                                | 0.61 (CI 0.36 - 1.03)     | 342,826 |
| Cardiac without MI <sup>6, 43, 44</sup>                                                                                   | *0.84 (CI 0.77 - 0.93)    | 342,941 |
| Myocardial infarction <sup>44, 45</sup>                                                                                   | 1.00 (CI 0.14 - 7.07)     | 277     |
| Pulmonary <sup>6, 43, 44, 46-48</sup>                                                                                     | *0.70 (CI 0.61 - 0.81)    | 343,198 |
| Respiratory failure <sup>43, 46-48</sup>                                                                                  | *0.49 (CI 0.29 - 0.82)    | 357     |
| Pneumonia <sup>44</sup>                                                                                                   | 0.34 (CI 0.01 - 8.15)     | 115     |
| Gastrointestinal <sup>6, 44</sup>                                                                                         | *0.55 (CI 0.43 - 0.70)    | 342,841 |
| Renal <sup>6, 43</sup>                                                                                                    | *0.67 (CI 0.59 - 0.76)    | 342,826 |
| Renal failure <sup>43</sup>                                                                                               | 0.33 (CI 0.01 - 7.99)     | 100     |
| Cognitive Dysfunction/Delirium <sup>43, 46, 49-51</sup>                                                                   | *0.40 (CI 0.26 - 0.62)    | 723     |
| Stroke <sup>6</sup>                                                                                                       | 0.83 (CI 0.53 - 1.29)     | 342,726 |
| Surgical site infection <sup>6, 43, 45, 47</sup>                                                                          | *0.56 (CI 0.48 - 0.65)    | 343,091 |
| Any infection <sup>6, 44</sup>                                                                                            | *0.72 (CI 0.65 - 0.79)    | 342,841 |
| Sepsis <sup>43, 47</sup>                                                                                                  | 0.33 (CI 0.03 - 3.12)     | 203     |
| Thromboembolism <sup>6, 47, 52, 53</sup>                                                                                  | *0.74 (CI 0.58 - 0.96)    | 342,955 |
| Perioperative nerve injury <sup>47, 48, 54-56</sup>                                                                       | 0.72 (CI 0.38 - 1.36)     | 11,410  |
| Blood transfusion <sup>6, 44, 51, 57, 58</sup>                                                                            | *0.87 (CI 0.86 - 0.89)    | 873,079 |
| Blood loss <sup>47, 48, 51, 52, 59-63</sup>                                                                               | 10.61 (CI -4.28 - 25.50)  | 454     |
| Critical care admission <sup>6, 54</sup>                                                                                  | *0.91 (CI 0.87 - 0.96)    | 342,885 |
| Length of stay <sup>44, 53, 54, 63-67</sup>                                                                               | *-0.36 (CI -0.42 - -0.31) | 872     |
| TKA                                                                                                                       |                           |         |
| Complications                                                                                                             | Total RR                  | N       |
| Mortality <sup>6, 29, 43, 70-76</sup>                                                                                     | 1.07 (CI 0.92 - 1.24)     | 932,102 |
| Cardiac without MI <sup>6, 43, 44, 72-75, 77-80</sup>                                                                     | *0.83 (CI 0.79 - 0.87)    | 720,282 |
| Myocardial infarction <sup>44, 71-73, 78, 81-83</sup>                                                                     | 0.57 (CI 0.19 - 1.76)     | 1,360   |
| Pulmonary <sup>6, 43, 44, 72-74, 80, 81, 84-96</sup>                                                                      | *0.84 (CI 0.79 - 0.89)    | 721,469 |
| Respiratory failure <sup>43, 74, 80, 84, 85, 87-94</sup>                                                                  | *0.40 (CI 0.21 - 0.78)    | 1,246   |
| Pneumonia <sup>44, 72, 73, 86, 95, 96</sup>                                                                               | 1.15 (CI 0.48 - 2.74)     | 705     |
| Gastrointestinal <sup>6, 44, 73, 74, 81, 83, 89, 96, 97</sup>                                                             | 0.93 (CI 0.84 - 1.04)     | 720,230 |
| Renal <sup>6, 43, 73, 74, 83, 95</sup>                                                                                    | 0.96 (CI 0.91 - 1.02)     | 720,111 |
| Renal failure <sup>43, 73, 74, 83, 95</sup>                                                                               | 0.82 (CI 0.34 - 2.00)     | 685     |
| Cognitive Dysfunction/Delirium <sup>43, 49, 72, 81-83, 88, 98-102</sup>                                                   | *0.58 (CI 0.41 - 0.84)    | 1,563   |
| Stroke <sup>6, 72, 81, 95</sup>                                                                                           | 0.95 (CI 0.76 - 1.18)     | 719,734 |
| Surgical site infection <sup>70 103 72 87 99 104 105 106 107 108 109 95 110 96 73 74 111 83 112 76 112 6 43 113 114</sup> | *0.86 (CI 0.80 - 0.91)    | 796,090 |
| Any infection <sup>6, 44, 72, 73, 76, 86, 89, 95, 96, 103, 115</sup>                                                      | *0.77 (CI 0.73 - 0.81)    | 789,622 |

|                                                                                                                                                                                                                                              |                              |           |
|----------------------------------------------------------------------------------------------------------------------------------------------------------------------------------------------------------------------------------------------|------------------------------|-----------|
| <b>Sepsis</b> <sup>43, 73, 74</sup>                                                                                                                                                                                                          | 1.37 (CI 0.27 - 6.89)        | 433       |
| <b>Thromboembolism</b> <sup>6, 72-74, 76, 79, 81, 83, 85, 87, 95, 99, 104-106, 108, 110, 111, 113, 116-119</sup>                                                                                                                             | *0.90 (CI 0.84 - 0.96)       | 790,835   |
| <b>Perioperative nerve injury</b><br>86, 95, 104, 120, 121                                                                                                                                                                                   | 1.42 (CI 0.88 - 2.29)        | 9,018     |
| <b>Blood transfusion</b> <sup>6, 44, 51, 57, 58, 73, 74, 122</sup>                                                                                                                                                                           | *0.92 (CI 0.91 - 0.93)       | 1,250,014 |
| <b>Blood loss</b> <sup>71, 74, 93, 94, 97, 105, 122-124</sup>                                                                                                                                                                                | *-42.53 (CI -52.08 - -32.98) | 890       |
| <b>Critical care admission</b> <sup>6, 70, 74, 83</sup>                                                                                                                                                                                      | †1.07 (CI 1.04 - 1.09)       | 719,767   |
| <b>Readmission</b> <sup>29, 76</sup>                                                                                                                                                                                                         | *0.66 (CI 0.62 - 0.71)       | 146,453   |
| <b>Length of stay</b> <sup>70 86 125 71 126 44 72 87 127 99 104 128 129 130 123 90 105 91 92 118 120 131 132 133 134 119 95 135 136 68 137 138 139 80 69 67 112 69 140 68 141 98 142 68 69 143 29 144 68 68 68 122 145 85 114 68 68 68</sup> | 0.02 (CI -0.01 - 0.04)       | 86,770    |

\* $P < 0.05$ ; MI: myocardial infarction; Pulmonary: pulmonary complications excluding pneumonia; CNS: central nervous system complications; All infections: all infections including pneumonia and sepsis; OR: odds ratio; CI: confidence interval; NA: neuraxial anaesthesia; GA: general anaesthesia; N (NA/GA): total number of patients with neuraxial/general anaesthesia
